# Supplementary material for: Carbon dots as artificial peroxidases for analytical applications
Source: PubMed Central journal article supplement — J Food Drug Anal. 2020 Dec 1;28(4):558–74. doi: 10.38212/2224-6614.1090 (PMC9261811; doi:10.38212/2224-6614.1090), 2020-12-01
Supplement: jfda-28-04-558-s001.pdf [file jfda-28-04-558-s001.pdf]

## Highlights

- Carbon dot nanozymes (CDzymes) possess peroxidase-like activity.
- CDzymes are sensitive for quantitation of hydrogen peroxide.
- CDzymes combined with various enzymes are suggested to detect important analytes.
